# Supplementary material for: Synthesis of some quaternary ammonium gemini surfactants and evaluation of their performance as corrosion inhibitors for carbon steel in oil well formation water containing sulfide ions
Source: Royal Society of Chemistry journal article supplement (doi:10.1039/c5ra15112k), 2015-01-01
Supplement: c5ra15112k1.pdf [file c5ra15112k1.pdf]

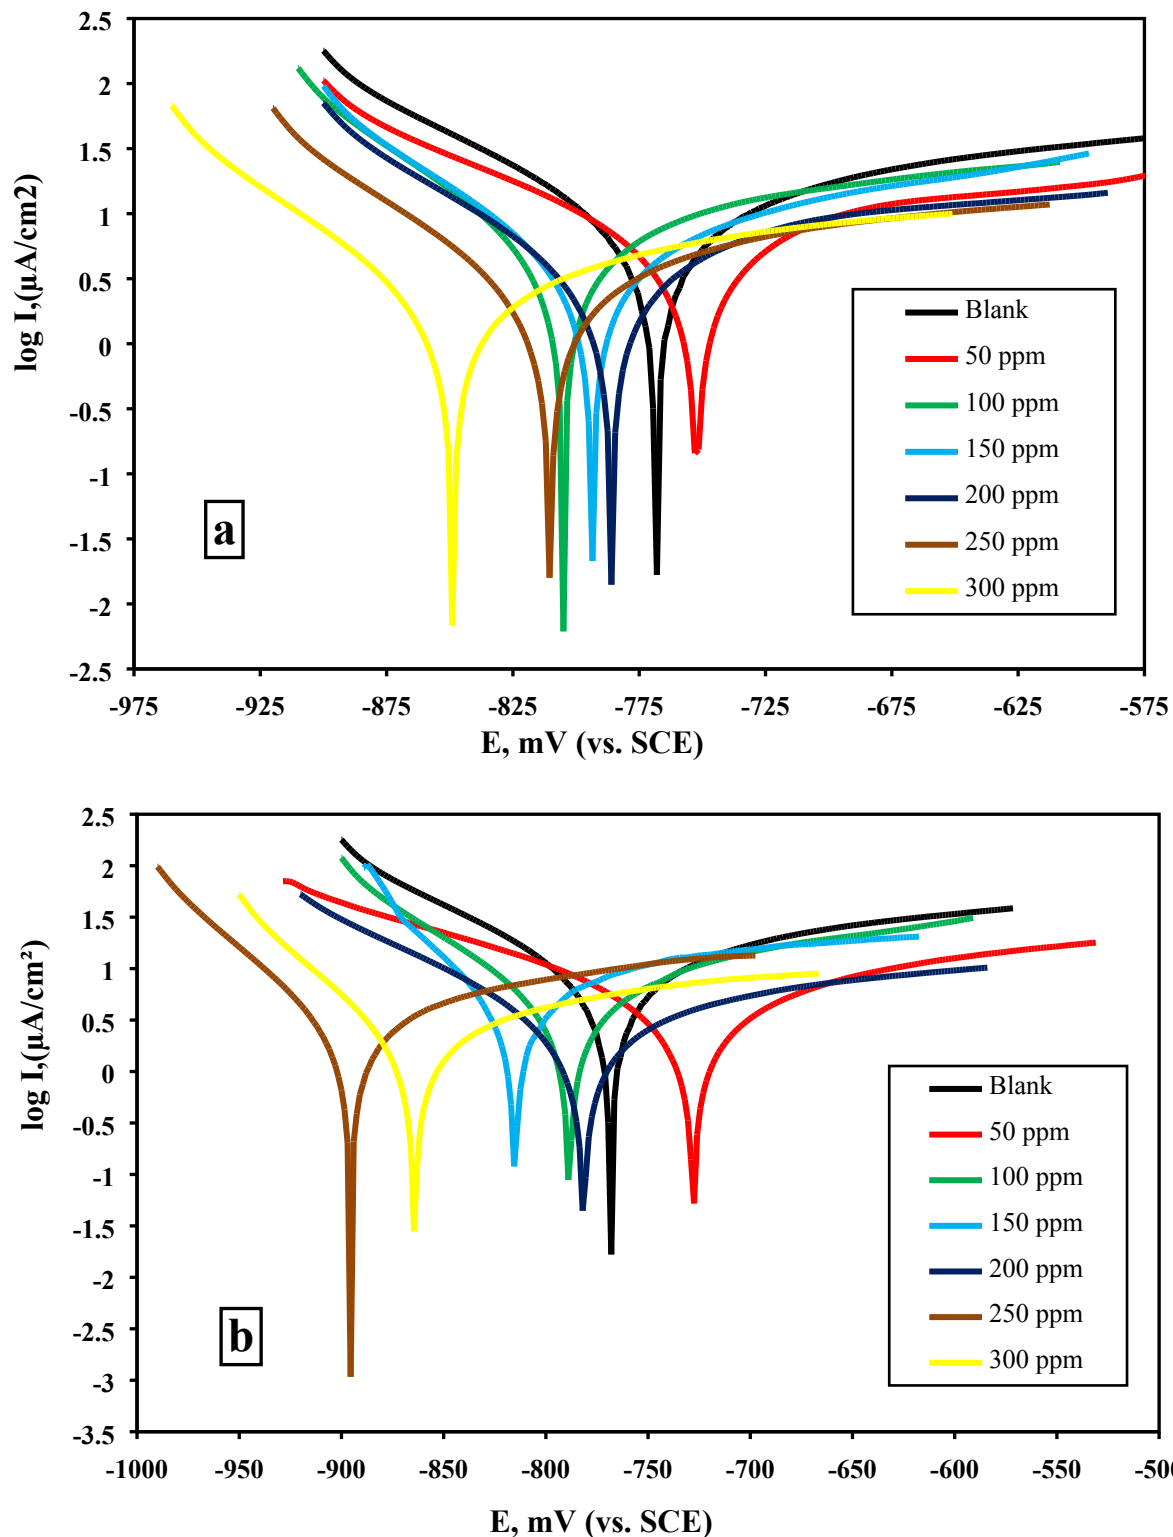

**Fig.1.** Potentiodynamic polarization of (a)  $E_{11}N_4$  and (b)  $E_{11}N_6$  for the carbon steel in formation water containing sulfide ions in the absence and presence of various concentrations at 25°C.

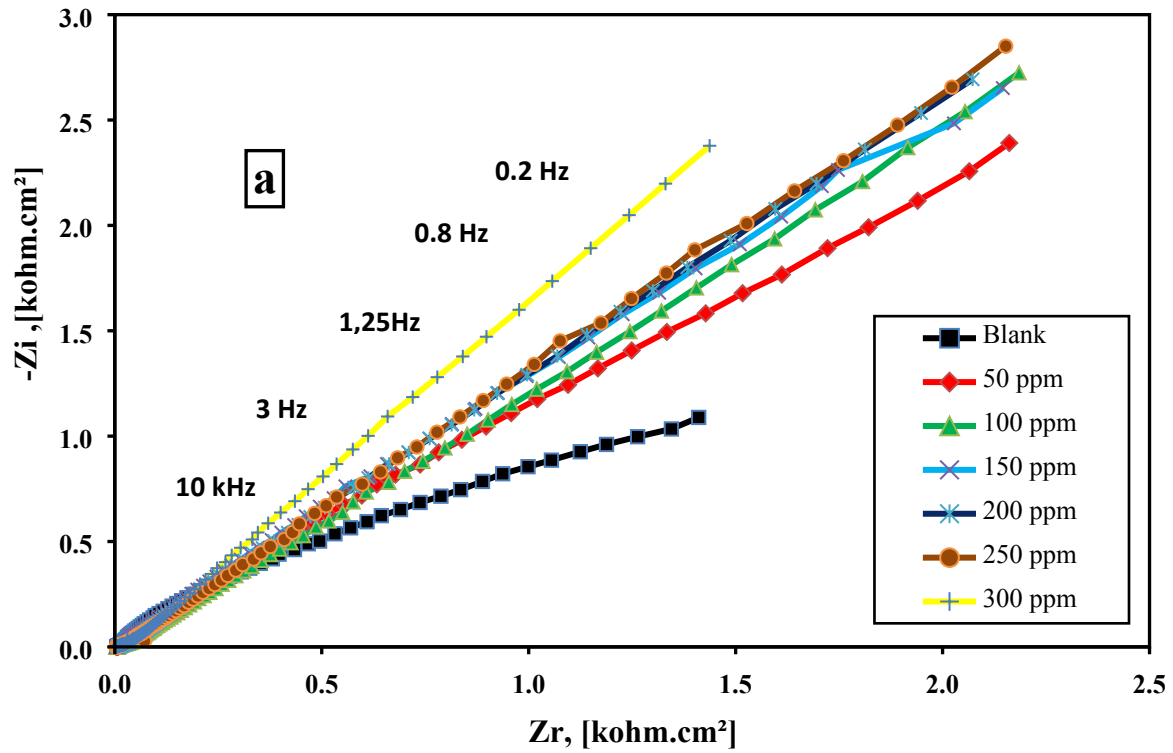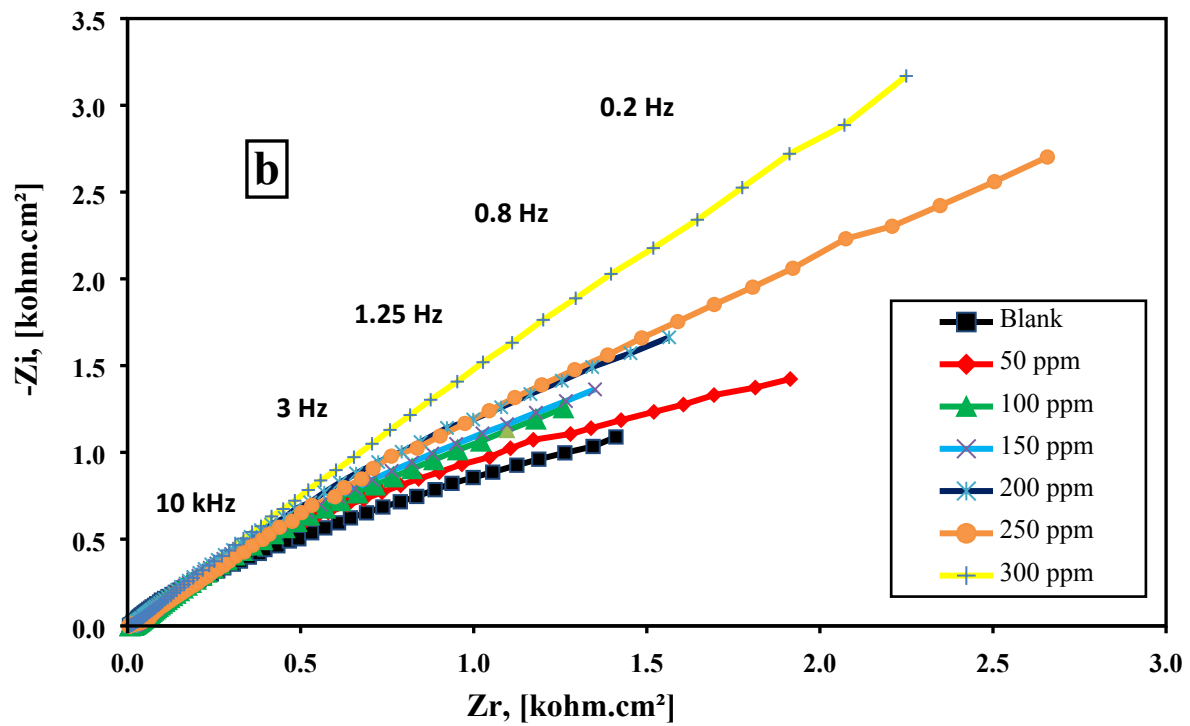

**Fig.2.** Nyquist plot of (a)  $E_{11}N_4$  and (b)  $E_{11}N_6$  for the carbon steel in formation water containing sulfide ions in the absence and presence of different concentrations at 25°C.

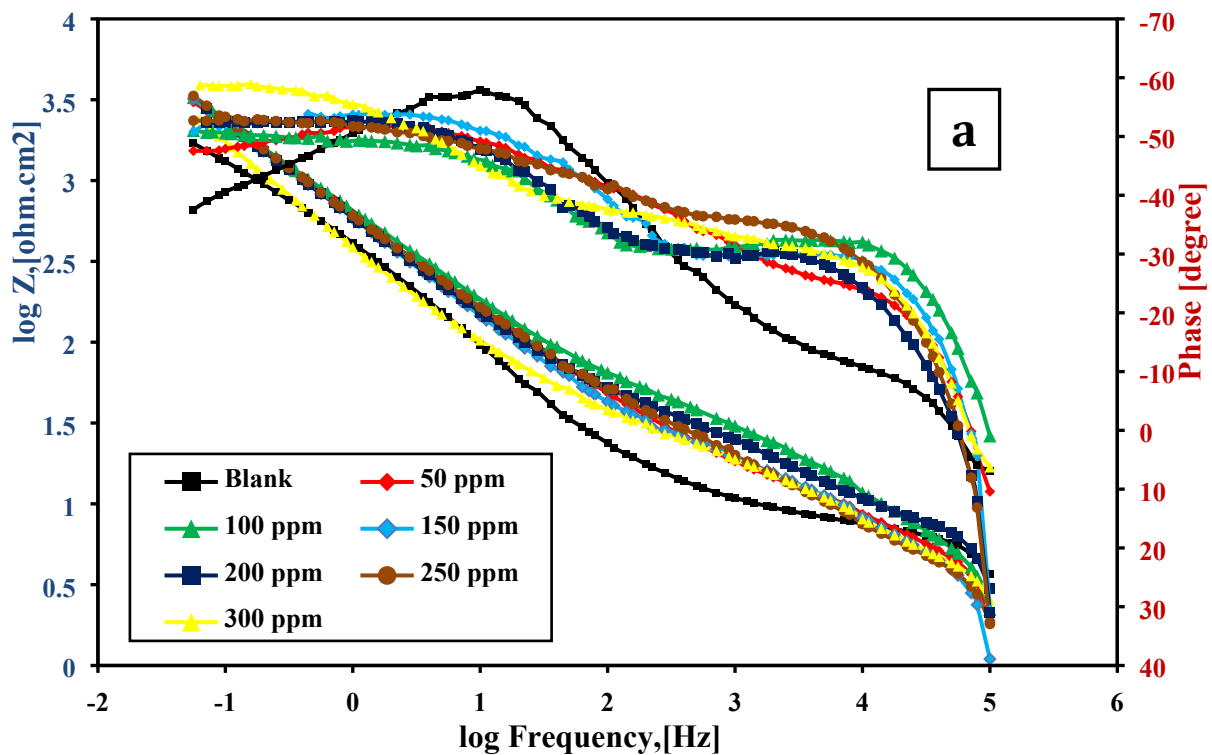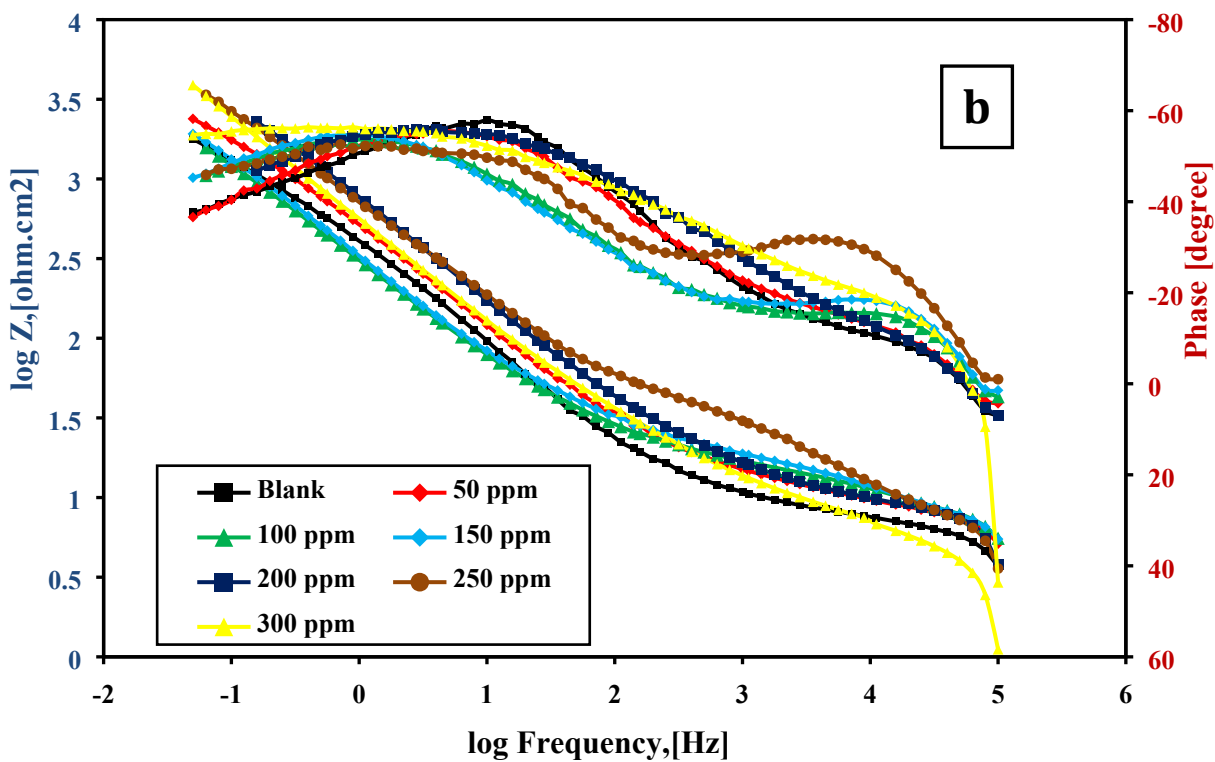

**Fig.3.** Bode plot of (a) E<sub>11</sub>N<sub>4</sub> and (b) E<sub>11</sub>N<sub>6</sub> for the carbon steel in formation water containing sulfide ions in the absence and presence of different concentrations at 25°C.
